# Supplementary material
Source: ML conference proceedings conference paper supplement (https://openreview.net/forum?id=Z2he2Y0MoH)
Supplement: supplementary_material [file attachment]

## 448 A Useful Mathematical Results

449 **Theorem A.1.** *Let  $A$  be  $m \times m$  random matrix whose entries  $A_{ij}$  are independent identically*  
 450 *distributed standard Gaussian random variables. Then, there exists absolute constant  $c, C > 0$  such*  
 451 *that*

$$\|A\|_{op} \leq C\sqrt{m}, \quad \text{with probability at least } 1 - 2e^{-cm}. \quad (16)$$

452 **Theorem A.2** (Strong Bai-Yin theorem). *Let  $A$  be  $m \times m$  random matrix whose entries  $A_{ij}$  are*  
 453 *independent identically distributed standard Gaussian random variables. Then*

$$\lim_{m \rightarrow \infty} \|A\|_{op}/\sqrt{m} = \sqrt{2}, \quad \text{almost surely.} \quad (17)$$

454 **Theorem A.3** (Kolmogorov's SLLN for i.i.d.). *Let  $\{X_n\}$  be sequence of i.i.d. random variables and*  
 455  *$S_n = \sum_{i=1}^n X_i$ . Then  $\frac{S_n}{n} \xrightarrow{a.s.} \mathbb{E}X_1$  if and only if  $\mathbb{E}|X_1| < \infty$ .*

456 **Lemma A.1** (Almost surely convergence). *Some important properties of almost surely convergence.*

457 1. *If  $X_n \xrightarrow{a.s.} X$ , then  $g(X_n) \xrightarrow{a.s.} g(X)$  for all continuous function  $g$ .*

458 2. *If  $X_n \xrightarrow{a.s.} X$  and  $Y_n \xrightarrow{a.s.} Y$ , then  $X_n Y_n \xrightarrow{a.s.} XY$ .*

459 3. *If  $X_n \xrightarrow{a.s.} X$  and  $Y_n \xrightarrow{a.s.} Y$ , then  $aX_n + bY_n \xrightarrow{a.s.} aX + bY$ .*

460 **Lemma A.2** (Gaussian smoothing). *Let  $f, g$  be a real-valued function. Define function  $F(\sigma) :=$*   
 461  *$\mathbb{E}_{z \sim \mathcal{N}(\mu, \sigma^2)} f(z)$  and  $G(\mu) = \mathbb{E}_{z \sim \mathcal{N}(\mu, \sigma^2)} g(z)$  for  $\sigma > 0$ . Suppose  $f(x), g(x) \in o(e^{-x^2})$ , then*

$$\begin{aligned} F'(\sigma) &= \frac{1}{\sigma} \mathbb{E}_{z \sim \mathcal{N}(0,1)} [f(\mu + \sigma z)(z^2 - 1)] \\ G'(\mu) &= \frac{1}{\sigma} \mathbb{E}_{z \sim \mathcal{N}(0,1)} [g(\mu + \sigma z)z] \end{aligned}$$

462 *Proof.* Note that  $F(\sigma) = \mathbb{E}_{z \sim \mathcal{N}(0,1)} f(\mu + \sigma z)$ , then

$$\begin{aligned} F'(\sigma) &= \frac{d}{d\sigma} \int_{-\infty}^{\infty} f(\mu + \sigma z) \frac{1}{\sqrt{2\pi}} e^{-z^2/2} dz \\ &= \int_{-\infty}^{\infty} f'(\mu + \sigma z) z \frac{1}{\sqrt{2\pi}} e^{-z^2/2} dz \\ &= \int_{-\infty}^{\infty} f'(u) \left( \frac{u - \mu}{\sigma} \right) \frac{1}{\sigma \sqrt{2\pi}} e^{-\frac{(u-\mu)^2}{2\sigma^2}} du, \quad u = \mu + \sigma z \\ &= \frac{1}{\sigma} \int_{-\infty}^{\infty} f(u) \left[ \frac{(u - \mu)^2}{\sigma^2} - 1 \right] \frac{1}{\sigma \sqrt{2\pi}} e^{-\frac{(u-\mu)^2}{2\sigma^2}} du \\ &= \frac{1}{\sigma} \int_{-\infty}^{\infty} f(\mu + \sigma z) [z^2 - 1] \frac{1}{\sqrt{2\pi}} e^{-\frac{z^2}{2}} dz \\ &= \frac{1}{\sigma} \mathbb{E}_{z \sim \mathcal{N}(0,1)} [f(\mu + \sigma z)(z^2 - 1)] \end{aligned}$$

463 Similarly, we have

$$\begin{aligned}
G'(\mu) &= \frac{d}{d\mu} \int_{-\infty}^{\infty} g(\mu + \sigma z) \frac{1}{\sqrt{2\pi}} e^{-z^2/2} dz \\
&= \int_{-\infty}^{\infty} g'(\mu + \sigma z) \frac{1}{\sqrt{2\pi}} e^{-z^2/2} dz \\
&= \int_{-\infty}^{\infty} g'(u) \frac{1}{\sigma\sqrt{2\pi}} e^{-\frac{(u-\mu)^2}{2\sigma^2}} du, \quad u = \mu + \sigma z \\
&= \frac{1}{\sigma} \int_{-\infty}^{\infty} g(u) \left( \frac{u-\mu}{\sigma} \right) \frac{1}{\sigma\sqrt{2\pi}} e^{-\frac{(u-\mu)^2}{2\sigma^2}} du \\
&= \frac{1}{\sigma} \int_{-\infty}^{\infty} g(\mu + \sigma z) z \frac{1}{\sqrt{2\pi}} e^{-\frac{z^2}{2}} dz \\
&= \frac{1}{\sigma} \mathbb{E}_{z \sim \mathcal{N}(0,1)} [g(\mu + \sigma z) z]
\end{aligned}$$

464

□

465 **Lemma A.3** (Gaussian conditioning). *Given  $G \in \mathbb{R}^{n \times m}$  and  $H \in \mathbb{R}^{n \times m}$ , let  $W \in \mathbb{R}^{n \times n}$  to follow*  
466 *matrix Gaussian distribution, i.e.,  $W \sim \mathcal{MN}(0, \sigma I_n, \sigma I_n)$  for some  $\sigma > 0$ , suppose  $G = WH$  has*  
467 *feasible solutions. Then the conditional distribution of  $W$  given on  $G = WH$  is*

$$W|_{G=WH} \sim \mathcal{MN}(GH^\dagger, I_n, \sigma^2 \Pi \Pi^T).$$

468 where  $\Pi = I_n - HH^\dagger$  is the orthogonal projection onto the null( $H^T$ ).

469 *Proof.* First, we consider the optimization problem

$$\min_W \frac{1}{2} \|W\|_F^2, \quad \text{s.t. } G = WH.$$

470 The Lagrange function is given by

$$L(W, V) = \frac{1}{2} \|W\|_F^2 + \langle V, G - WH \rangle.$$

471 The KKT condition implies  $\nabla_W L(W, V) = W - VH^T = 0$  and further  $W = VH^T$ . Since  
472  $G = WH$ , we have  $V = G(H^T H)^\dagger$  and so  $W^* = G(H^T H)^\dagger H^T = GH^\dagger$ .

473 Then let  $\Pi = I_n - HH^\dagger$  be the orthogonal projection onto the null( $H^T$ ). Thus, the conditional  
474 distribution of  $W$  given  $G = WH$  is

$$W|_{G=WH} = GH^\dagger + \tilde{W}\Pi^T = \mathcal{MN}(GH^\dagger, I_n, \sigma^2 \Pi \Pi^T).$$

475

□

476 **Lemma A.4** (Conditional distribution). *Let  $X \sim \mathcal{MN}(M, U, V)$ . Partition  $X$ ,  $M$ , and  $V$  such that*

$$X = \begin{bmatrix} X_1 \\ X_2 \end{bmatrix}, \quad M = \begin{bmatrix} M_1 \\ M_2 \end{bmatrix}, \quad U = \begin{bmatrix} U_{11} & U_{12} \\ U_{21} & U_{22} \end{bmatrix}$$

477 where  $X_1 \in \mathbb{R}^{m \times p}$ . Then

$$\begin{aligned}
X_1 &\sim \mathcal{MN}(M_1, U_{11}, V) \\
X_2|X_1 &\sim \mathcal{MN}(M_2 + U_{21}U_{11}^{-1}(X_1 - M_1), U_{22} - U_{21}U_{11}^{-1}U_{12}, V).
\end{aligned}$$

478 Note, if  $U_{21} = 0$ , then  $X_2|X_1 \sim \mathcal{MN}(M_2, U_{22}, V)$  indicates  $X_2$  and  $X_1$  are **independent**.

479 **Lemma A.5.** *Let  $\sigma$  be a  $L$ -Lipschitz continuous function. Then  $\sigma$  is also a controllable function. In*  
480 *addition,  $\phi(x, y) := \sigma(x)\sigma(y)$  is also a controllable function.*

481 *Proof.* WOLG, we can assume  $L = 1$ . As  $\sigma$  is Lipschitz continuous on its region, there must exists  
 482 some  $x_0$  such that  $\sigma(x_0) = c$ . Then we have

$$|\sigma(x)| \leq |\sigma(x) - \sigma(x_0)| + |c| \leq |x - x_0| + |c| \leq e^{|c|^{-1}|x-x_0|} \leq e^{|c|^{-1}|x_0|} e^{|c|^{-1}|x|} = C_1 e^{C_2|x|}.$$

483 Similarly, we have

$$|\phi(x, y)| = |\sigma(x)| |\sigma(y)| \leq C_1 e^{C_2(|x|+|y|)}.$$

484

□

485 **Lemma A.6.** *Let  $f$  be a controllable function. Then for all  $\mu \in \mathbb{R}$  and  $\sigma \geq 0$ , we have*

$$\mathbb{E}_{z \sim \mathcal{N}(\mu, \sigma^2)} |f(z)| \leq 2C_1 e^{C_2|\mu| + C_2^2 \sigma^2 / 2}.$$

486 *Proof.* Note that

$$\begin{aligned} \mathbb{E}_{z \sim \mathcal{N}(\mu, \sigma^2)} |f(z)| &= \mathbb{E}_{z \sim \mathcal{N}(0, 1)} |f(\sigma z + \mu)| \\ &\leq \mathbb{E}_{z \sim \mathcal{N}(0, 1)} C_1 e^{C_2(\sigma|z| + |\mu|)} \\ &= C_1 e^{C_2|\mu|} \mathbb{E}_{z \sim \mathcal{N}(0, 1)} e^{C_2\sigma|z|} \\ &= C_1 e^{|\mu|} \int_{-\infty}^{\infty} e^{C_2\sigma|z|} \frac{1}{\sqrt{2\pi}} e^{-z^2/2} dz \\ &= C_1 e^{|\mu|} \left[ \int_{-\infty}^0 e^{-C_2\sigma z} \frac{1}{\sqrt{2\pi}} e^{-z^2/2} dz + \int_0^{\infty} e^{C_2\sigma z} \frac{1}{\sqrt{2\pi}} e^{-z^2/2} dz \right] \\ &= C_1 e^{|\mu|} \left[ \int_{-\infty}^0 \frac{1}{\sqrt{2\pi}} e^{-\frac{1}{2}(z+C_2\sigma)^2 + \frac{C_2^2\sigma^2}{2}} dz + \int_0^{\infty} \frac{1}{\sqrt{2\pi}} e^{-\frac{1}{2}(z-C_2\sigma)^2 + \frac{C_2^2\sigma^2}{2}} dz \right] \\ &\leq 2C_1 e^{C_2|\mu| + C_2^2 \sigma^2 / 2} \end{aligned}$$

487

□

## B Proof of Theorem 4.1

In this Appendix, we show the preactivation  $g_k^\ell$  acts like Gaussian random variable. As a consequence, the finite-depth neural network  $f_\theta^L$  tends to a Gaussian process as width  $n \rightarrow \infty$ .

**Lemma B.1.** *Suppose the activation function  $\phi$  is nonlinear Lipschitz continuous function. For input  $x$ , let  $g^1, \dots, g^\ell$  be the resulting pre-activations for  $\ell \in [L]$ . Then for any  $\ell \in [L]$  and for any controllable function  $\Phi : \mathbb{R}^\ell \rightarrow \mathbb{R}$ , we have as  $m \rightarrow \infty$*

$$\frac{1}{n} \sum_{k=1}^n \Phi(g_k^1, \dots, g_k^\ell) \xrightarrow{a.s.} \mathbb{E} [\Phi(z^1, \dots, z^\ell)], \quad (18)$$

where  $(z^i, z^j) \sim \mathcal{N}(0, \Sigma)$  and the covariance matrix  $\Sigma \in \mathbb{R}^{2 \times 2}$  are computed recursively as follows

$$\Sigma(z^1, z^i) = \delta_{1,i} \sigma_u^2 \|x\|^2 / n_{in}, \quad \forall i \geq 1, \quad (19)$$

$$\Sigma(z^i, z^j) = \sigma_w^2 \mathbb{E} \phi(u^{i-1}) \phi(u^{j-1}), \quad \forall i \geq 2. \quad (20)$$

where  $u^1 = z^1$  and  $u^\ell = z^\ell + z^1$  with covariance

$$\Sigma(u^1, u^i) = \sigma_u^2 \|x\|^2 / n_{in}, \quad \forall i \geq 1, \quad (21)$$

$$\Sigma(u^i, u^j) = \Sigma(z^i, z^j) + \Sigma(z^1, z^1), \quad \forall i \geq 2. \quad (22)$$

If, in addition,  $W^i$  and  $W^j$  are independent, then

$$\Sigma(z^i, z^j) = 0, \quad \forall i \neq j. \quad (23)$$

**Lemma B.2.** [37, Theorem 5.4] *For any NETSOR program whose weight matrices are random initiated as (5) and all activation functions are controllable. If  $g^1, \dots, g^\ell$  are any G-vars (i.e., pre-activation in our case), then for any controllable function  $\Phi : \mathbb{R}^\ell \rightarrow \mathbb{R}$ , we have*

$$\frac{1}{n} \sum_{k=1}^n \Phi(g_k^1, \dots, g_k^\ell) \xrightarrow{a.s.} \mathbb{E}_{z \sim \mathcal{N}(\mu, \Sigma)} \Phi(z), \quad (24)$$

where  $z := (z^1, \dots, z^\ell)$  and  $\mu$  and  $\Sigma$  can be computed by [37, Definition 5.2].

Intuitively, these two Lemmas indicate that  $(g_k^1, \dots, g_k^\ell)$  acts like a multidimensional Gaussian vector whose covariance can be computed recursively. Lemma B.1 is a special case of Lemma B.2 as Lemma B.1 requires each pre-activation  $g^\ell$  encoded same input  $x$ , while Lemma B.2 does not make such assumption. In fact, the proof techniques are identical, i.e., uses Gaussian conditions and smoothing inductively on previous results. To make the paper self-contained, here we provide a proof for Lemma B.1 where we simplify the proof of [37, Theorem 5.4] in the following subsections by removing so-called *core set*.

### B.1 Proof of Theorem 4.1 by Using Master Theorem B.1 or B.2

Based on Lemma B.1 or B.2, we can immediately obtain the desired result.

For simplicity, we assume  $\sigma_\ell = 1$ . We prove the desired result by induction. For  $L = 1$ , we have  $f_\theta^L(x) = g^1(x) = W^1 x$  and

$$f_{\theta,k}^1(x) = g_k^1(x) = \langle w_k, x \rangle \stackrel{i.i.d.}{\sim} \mathcal{N}(0, \|x\|^2 / n_{in}).$$

Then we have

$$\hat{\Sigma}^1(x, x') = \text{cov}(f_{\theta,k}^L(x), f_{\theta,k}^L(x')) = \langle x, x' \rangle := \Sigma^1(x, x').$$

For  $L = 2$ , we have  $f_\theta^L(x) = g^2(x) = W^2 h^1(x)$ . By condition on  $g^1$ , we have

$$f_{\theta,k}^2(x) = g_k^2(x) = \langle w_k^2, h^1(x) \rangle \stackrel{i.i.d.}{\sim} \mathcal{N}(0, \|h^1(x)\|^2 / n).$$

514 Then

$$\begin{aligned}
\hat{\Sigma}^2(x, x') &= \langle h^1(x), h^1(x') \rangle / n \\
&= \langle \phi(g^1(x)), \phi(g^1(x')) \rangle / n \\
&= \frac{1}{n} \sum_{i=1}^n \phi(g_i^1(x)) \phi(g_i^1(x')) \\
&\xrightarrow{a.s.} \mathbb{E} \phi(z^1(x)) \phi(z^1(x')) \\
&=: \Sigma^2(x, x'),
\end{aligned}$$

515 where

$$(z^1(x), z^1(x')) \sim \mathcal{N} \left( 0, \begin{bmatrix} \Sigma^1(x, x) & \Sigma^1(x, x') \\ \Sigma^1(x', x) & \Sigma^1(x', x') \end{bmatrix} \right).$$

516 Now, we assume the results holds for  $L$ . Then we show the result for  $f_{\theta}^{L+1}(x)$ . In this case, we have  
517  $f_{\theta}^{L+1}(x) = g^{L+1}(x)$ . By condition on the values  $g^L$ , we have the output  $f_{\theta, k}^{L+1}$  are *i.i.d.* centered  
518 Gaussian random variables, *i.e.*,

$$f_{\theta, k}^{L+1}(x) = g_k^{L+1}(x) = \langle w_k^{L+1}, h^L(x) \rangle \stackrel{i.i.d.}{\sim} \mathcal{N}(0, \|h^L(x)\|^2 / n).$$

519 Then we have

$$\begin{aligned}
\hat{\Sigma}^{L+1}(x, x') &= \text{Cov}(f_{\theta, k}^{L+1}(x), f_{\theta, k}^{L+1}(x')) \\
&= \langle h^L(x), h^L(x') \rangle / n \\
&= \frac{1}{n} \sum_{i=1}^n \phi(g_i^L(x) + g_i^1(x)) \phi(g_i^L(x') + g_i^1(x')) \\
&\xrightarrow{a.s.} \mathbb{E} \phi(z^L(x) + z^1(x)) \phi(z^L(x') + z^1(x')) \\
&=: \Sigma^{L+1}(x, x').
\end{aligned}$$

520 where

$$\begin{bmatrix} z^1(x) \\ z^L(x) \\ z^1(x') \\ z^L(x') \end{bmatrix} \sim \mathcal{N} \left( 0, \begin{bmatrix} \Sigma^1(x, x) & 0 & \Sigma^1(x, x') & 0 \\ 0 & \Sigma^L(x, x) & 0 & \Sigma^L(x, x') \\ \Sigma^1(x', x) & 0 & \Sigma^1(x', x') & 0 \\ 0 & \Sigma^L(x', x) & 0 & \Sigma^L(x', x') \end{bmatrix} \right).$$

521 Here the covariance is deterministic and independent of  $g^L$ . Consequently, the conditioned and  
522 unconditioned distributions of  $f_{\theta, k}^{L+1}$  are equal in the limit: they are *i.i.d.* centered Gaussian random  
523 variables with covariance  $\Sigma^{L+1}$ .

## 524 B.2 Proof of Lemma B.1: the basic case $\ell = 1$

525 WLOG, we can assume  $\sigma_{\ell} = 1$ . We prove by induction. When  $\ell = 1$ , we have

$$g^1 = W_1 x$$

526 so that

$$g_k^1 \stackrel{i.i.d.}{\sim} \mathcal{N}(0, \|x\|^2 / n_{in}).$$

527 Given a controllable function  $\Phi$ , the random variables  $X_k = \Phi(g_k^1)$  are still *i.i.d.*. It follows from  
528 Lemma A.6 that

$$\mathbb{E} |X_1| = \mathbb{E}_{z \sim \mathcal{N}(0, \|x\|^2)} |\Phi(z)| \leq C_1 e^{C_2 \|x\|^2} < \infty.$$

529 Then the desired result is obtained by following Theorem A.3 the classical Kolmogorov's SLLN for  
530 *i.i.d.* random variables.

531 **B.3 Proof of Lemma B.1: general case for independent matrices  $W^k \neq W^\ell$**

532 Suppose the desired result hold for  $\ell$ , then we show the result also hold for  $\ell + 1$ . In addition, we  
 533 assume the weight matrices  $W^\ell$  are independent to each other. Thus, the weight matrix  $W^{\ell+1}$  are  
 534 not used in previous layers. For brevity, we denote  $W := W^{\ell+1}$  and so we have expression

$$g^{\ell+1} = Wh^\ell.$$

535 Here the randomness of  $g^{\ell+1}$  comes from both  $W$  and  $h^\ell$ . As  $W$  is not used before,  $W$  and  $h^\ell$  are  
 536 independent. Let  $\mathcal{B}$  be the  $\sigma$ -algebra spanned by all previous  $g^1, g^2, \dots, g^\ell$ . Then the conditional  
 537 distribution of  $g^{\ell+1}$  on  $\mathcal{B}$  is given by

$$g^{\ell+1}|\mathcal{B} \sim \mathcal{N}(0, \|h^\ell\|^2/nI_n),$$

538 or equivalently

$$g_k^{\ell+1}|\mathcal{B} \stackrel{i.i.d.}{\sim} \mathcal{N}(0, \|h^\ell\|^2/n). \quad (25)$$

539 By using the inductive hypothesis, we have

$$\sigma_n^2 := \|h^\ell\|^2/n = \frac{1}{n} \sum_{k=1}^n \phi(g_k^\ell + g_k^1)^2 \stackrel{a.s.}{\rightarrow} \mathbb{E} [\phi(z^\ell + z^1)]^2 = \Sigma(z^{\ell+1}, z^{\ell+1}) := \sigma^2, \quad (26)$$

540 where we use the fact  $\Phi(x, y) := \phi(x + y)$  is controllable, *i.e.*,

$$|\Phi(x, y)| = |\phi(x + y)| \leq |x + y| \leq e^{|x|+|y|}.$$

541 By using triangle inequality, we have

$$\left| \frac{1}{n} \sum_{k=1}^n \Phi(g_k^1, \dots, g_k^{\ell+1}) - \mathbb{E} [\Phi(z^1, \dots, z^{\ell+1})] \right| \leq |A_n| + |B_n| + |C_n|,$$

542 where

$$A_n = \frac{1}{n} \sum_{k=1}^n \Phi(g_k^1, \dots, g_k^{\ell+1}) - \frac{1}{n} \sum_{k=1}^n \mathbb{E}_{z \sim \mathcal{N}(0, \sigma_n^2)} \Phi(g_k^1, \dots, g_k^\ell, z) \quad (27)$$

$$B_n = \frac{1}{n} \sum_{k=1}^n \mathbb{E}_{z \sim \mathcal{N}(0, \sigma_n^2)} \Phi(g_k^1, \dots, g_k^\ell, z) - \frac{1}{n} \sum_{k=1}^n \mathbb{E}_{z \sim \mathcal{N}(0, \sigma^2)} \Phi(g_k^1, \dots, g_k^\ell, z) \quad (28)$$

$$C_n = \frac{1}{n} \sum_{k=1}^n \Phi(g_k^1, \dots, g_k^\ell, z) - \mathbb{E} [\Phi(z^1, \dots, z^{\ell+1})] \quad (29)$$

543  $A_n$  converges to 0 almost surely

544 Define random variables  $Z_k := \Phi(g_k^1, \dots, g_k^\ell, g_k^{\ell+1}) - \mathbb{E}_{z \sim \mathcal{N}(0, \sigma_n^2)} \Phi(g_k^1, \dots, g_k^\ell, z)$ . By equation  
 545 (25), we have  $g_k^{\ell+1}|\mathcal{B} \stackrel{i.i.d.}{\sim} \mathcal{N}(0, \sigma_n^2)$ , we can easily show  $X_k$  are centered and uncorrelated. Observe  
 546 that

$$\begin{aligned} \mathbb{E} Z_k &= \mathbb{E}_{\mathcal{B}} \mathbb{E}_{g^{\ell+1}|\mathcal{B}} Z_k \\ &= \mathbb{E}_{\mathcal{B}} \mathbb{E}_{g^{\ell+1}|\mathcal{B}} [\Phi(g_k^1, \dots, g_k^\ell, g_k^{\ell+1}) - \mathbb{E}_{z \sim \mathcal{N}(0, \sigma_n^2)} \Phi(g_k^1, \dots, g_k^\ell, z)] \\ &= \mathbb{E}_{\mathcal{B}} [\mathbb{E}_{g^{\ell+1}|\mathcal{B}} \Phi(g_k^1, \dots, g_k^\ell, g_k^{\ell+1}) - \mathbb{E}_{z \sim \mathcal{N}(0, \sigma_n^2)} \Phi(g_k^1, \dots, g_k^\ell, z)] \\ &= \mathbb{E}_{\mathcal{B}} [\mathbb{E}_{z \sim \mathcal{N}(0, \sigma_n^2)} \Phi(g_k^1, \dots, g_k^\ell, z) - \mathbb{E}_{z \sim \mathcal{N}(0, \sigma_n^2)} \Phi(g_k^1, \dots, g_k^\ell, z)] \\ &= \mathbb{E}_{\mathcal{B}} [0] = 0. \end{aligned}$$

547 Similarly, we obtain  $\mathbb{E} Z_k Z_{k'} = \delta_{kk'} \mathbb{E} |Z_k|^2$ . Moreover, we can upper bound  $\mathbb{E} [Z_k | \mathcal{B}]^2$  as follows

$$\begin{aligned}
\mathbb{E} [Z_k | \mathcal{B}]^2 &= \mathbb{E}_{g^{\ell+1} | \mathcal{B}} |\Phi(g_k^1, \dots, g_k^\ell, g_k^{\ell+1}) - \mathbb{E}_{z \sim \mathcal{N}(0, \sigma_n^2)} \Phi(g_k^1, \dots, g_k^\ell, z)|^2 \\
&\leq 8 \mathbb{E}_{z \sim \mathcal{N}(0, \sigma_n^2)} |\Phi(g_k^1, \dots, g_k^\ell, z)|^2, \quad (a) \\
&= 8 \mathbb{E}_{z \sim \mathcal{N}(0, 1)} |\Phi(g_k^1, \dots, g_k^\ell, \sigma_n z)|^2 \\
&\leq 8 \mathbb{E}_{z \sim \mathcal{N}(0, 1)} C_1 e^{2C_2 (\sum_{i=1}^\ell |g_k^i| + \sigma_n |z|)}, \quad \Phi \text{ is controllable} \\
&= 8 C_1 e^{2C_2 \sum_{i=1}^\ell |g_k^i|} \mathbb{E}_{z \sim \mathcal{N}(0, 1)} e^{2C_2 \sigma_n |z|} \\
&\leq 8 C_1 e^{2C_2 \sum_{i=1}^\ell |g_k^i|} e^{2C_2^2 \sigma_n^2}.
\end{aligned}$$

548 where (a) is due to maximal and Jensen's inequality.

549 Since  $e^{2C_2 \sum_{i=1}^\ell |g_k^i|}$  is controllable and  $\sigma_n \xrightarrow{a.s.} \sigma$ , it follows from the inductive hypothesis that

$$\frac{1}{n} \sum_{k=1}^n \mathbb{E} [Z_k | \mathcal{B}]^2 \leq 8 C_1 \cdot \left( \frac{1}{n} \sum_{k=1}^n e^{2C_2 \sum_{i=1}^\ell |g_k^i|} \right) \cdot e^{2C_2^2 \sigma_n^2} \xrightarrow{a.s.} 8 C_1 \mathbb{E} e^{2C_2 \sum_{i=1}^\ell |z_i|} \cdot e^{2C_2^2 \sigma^2}.$$

550 As the RHS is a deterministic constant, we have

$$\frac{1}{n} \sum_{k=1}^n \mathbb{E} [Z_k | \mathcal{B}]^2 \in o(n^\rho), \quad \forall \rho > 0.$$

551 or equivalently,  $\frac{1}{n} \sum_{k=1}^n \mathbb{E} [Z_k | \mathcal{B}]^2 \leq n^\rho$  for large enough  $n$ .

552 Now, we will first show  $A_{n^2} \xrightarrow{a.s.} 0$ . For any  $\epsilon > 0$ , we have for large enough  $n$

$$\begin{aligned}
\mathbb{P}(|A_{n^2}| \geq \epsilon) &\leq \epsilon^{-2} n^{-4} \mathbb{E} |A_{n^2}|^2 \\
&= \epsilon^{-2} n^{-4} \sum_{k, k'=1}^{n^2} \mathbb{E} [Z_k Z_{k'}] \\
&= \epsilon^{-2} n^{-4} \sum_{k=1}^{n^2} \mathbb{E} |Z_k|^2 \\
&= \epsilon^{-2} n^{-2} \mathbb{E}_{\mathcal{B}} \left[ \frac{1}{n^2} \sum_{k=1}^{n^2} \mathbb{E} |Z_k | \mathcal{B}|^2 \right] \\
&= \epsilon^{-2} n^{-2} \mathbb{E}_{\mathcal{B}} [n^{2\rho}] \\
&\leq \epsilon^{-2} n^{-2+2\rho}.
\end{aligned}$$

553 Furthermore, we obtain

$$\sum_{n=1}^{\infty} \mathbb{P}(|A_{n^2}| \geq \epsilon) \leq \sum_{n=1}^{\infty} \epsilon^{-2} n^{-2+2\rho} < \infty,$$

554 provided we choose  $0 < \rho < 1/2$ . Thus, it follows from Borel-Cantelli lemma that  $A_{n^2} \xrightarrow{a.s.} 0$ .

555 Now for each  $n$ , we define  $k_n := \sup\{k \in \mathbb{N} : k^2 \leq n\}$ , then we have  $k_n^2 \leq n \leq (k_n + 1)^2$ . Note  
556 that

$$A_n = \frac{1}{n} \sum_{i=1}^n Z_i = \frac{1}{n} \sum_{i=1}^{k_n^2} Z_i + \frac{1}{n} \sum_{i=k_n^2+1}^n Z_i.$$

557 We will show the two terms goes 0 a.s.. As we just proved, the first term goes to 0 a.s., since

$$\left| \frac{1}{n} \sum_{i=1}^{k_n^2} Z_i \right| \leq \left| \frac{1}{k_n^2} \sum_{i=1}^{k_n^2} Z_i \right| \xrightarrow{a.s.} 0.$$

558 For the second term, let  $T_n := \frac{1}{n} \sum_{i=k_n^2+1}^n Z_i$ , then for  $n$  large enough

$$\begin{aligned}
\mathbb{P}(|T_n| \geq \epsilon) &\leq \epsilon^{-2} n^{-2} \sum_{i=k_n^2+1}^n \mathbb{E} Z_i^2 \\
&\leq \epsilon^{-2} k_n^{-4} \sum_{i=k_n^2+1}^n \mathbb{E} Z_i^2 \\
&\leq \epsilon^{-2} k_n^{-4} (n - k_n^2) \left( \frac{1}{n - k_n^2} \sum_{i=k_n^2+1}^n \mathbb{E} Z_i^2 \right) \\
&\leq \epsilon^{-2} k_n^{-4} (n - k_n^2)^{1+\rho} \\
&\leq C \epsilon^{-2} k_n^{-4} (2k_n + 1)^{1+\rho} \\
&\leq C \epsilon^{-2} k_n^{-3+\rho}
\end{aligned}$$

559 where  $C$  is some fixed constant. Then we have

$$\begin{aligned}
\sum_{n=1}^{\infty} \mathbb{P}(|T_n| \geq \epsilon) &\leq \sum_{n=1}^{\infty} C \epsilon^{-2} k_n^{-3+\rho} \\
&\leq \sum_{n=1}^{\infty} C \epsilon^{-2} (\sqrt{n} - 1)^{-3+\rho} \\
&\leq \sum_{n=1}^4 C \epsilon^{-2} (\sqrt{n} - 1)^{-3+\rho} + 2C \epsilon^{-2} \sum_{n=4}^{\infty} n^{-(3-\rho)/2} \\
&< \infty,
\end{aligned}$$

560 provided we choose  $0 < \rho < 1$ . Therefore, by choosing  $0 < \rho < 1/2$ , it follows from Borel-Cantelli  
561 lemma that  $T_n \xrightarrow{a.s.} 0$  and further  $A_n \xrightarrow{a.s.} 0$ .

562  **$B_n$  converges to 0 almost surely**

563 First of all, we will show  $\sigma > 0$  by which we can use Gaussian smoothing to show  $B_n \xrightarrow{a.s.} 0$ .

564 **Lemma B.3.** *For  $\ell \geq 1$ , if  $\Sigma(z^\ell, z^\ell) > 0$ , then  $\Sigma(z^{\ell+1}, z^{\ell+1}) > 0$ .*

565 *Proof.* We prove by contradiction. Assume  $\Sigma(z^{\ell+1}, z^{\ell+1}) = 0$ . Then we have

$$0 = \Sigma(z^{\ell+1}, z^{\ell+1}) = \mathbb{E} \phi(z^\ell + z^1)^2 = \mathbb{E} \phi(u^\ell)^2,$$

566 where  $u^\ell \sim \mathcal{N}(0, \Sigma(z^\ell, z^\ell) + \|x\|^2/n_{in})$ . It implies  $\phi(z) = 0$  almost surely, but it contradicts  $\phi$  is  
567 non-constant function since  $\Sigma(z^\ell, z^\ell) + \|x\|^2/n_{in} > 0$ .  $\square$

568 It follows from Lemma B.3 that  $\sigma > 0$ . Then  $\sigma_n \xrightarrow{a.s.} \sigma$ , we have  $\sigma_n \geq \sigma/2 > 0$  eventually, almost  
569 surely. To use Gaussian smoothing, we define following functions

$$f_k(x) := \Phi(g_k^1, \dots, g_k^\ell, x), \quad F_k(\sigma) := \mathbb{E}_{z \sim \mathcal{N}(0, \sigma^2)} f_k(z).$$



570 By using Gaussian smoothing, we have for large enough  $n$

$$\begin{aligned}
|B_n| &\leq \frac{1}{n} \sum_{k=1}^n |F_k(\sigma_n) - F_k(\sigma)| \\
&\leq \frac{1}{n} \sum_{k=1}^n \int_{\sigma}^{\sigma_n} |F'_k(t)| dt, \quad \text{assume } \sigma \leq \sigma_n \\
&\leq \frac{1}{n} \sum_{k=1}^n \int_{\sigma}^{\sigma_n} t^{-1} \mathbb{E}_{z \sim \mathcal{N}(0,1)} |f_k(tz)(t^2 - 1)| dt, \quad (a) \\
&\leq \frac{1}{n} \sum_{k=1}^n \int_{\sigma}^{\sigma_n} t^{-1} \mathbb{E}_{z \sim \mathcal{N}(0,1)} C_1 e^{C_2 \sum_{i=1}^{\ell} |g_k^i| + C_2 t|z| + t} dt, \quad (b) \\
&\leq \frac{1}{n} \sum_{k=1}^n \int_{\sigma}^{\sigma_n} t^{-1} C_1 e^{C_2 \sum_{i=1}^{\ell} |g_k^i| + C_2 t^2/2 + t} dt, \quad (c) \\
&= C_1 \left( \frac{1}{n} \sum_{k=1}^n e^{C_2 \sum_{i=1}^{\ell} |g_k^i|} \right) (\alpha(\sigma_n) - \alpha(\sigma))
\end{aligned}$$

571 where (a) is by Lemma A.2 and Jensen's inequality, (b) is because  $f_k$  is controllable since  $\Phi$  is, (c) is  
572 by Lemma A.6, and  $\alpha(t)$  is the anti-derivative of the function  $\dot{\alpha}(t) = t^{-1} C_1 e^{C_2 t^2/2 + t}$ . Here,  $\dot{\alpha}(t)$  is  
573 continuous, so that  $\alpha(t)$  is well-defined and continuous. Since  $e^{C_2 \sum_{i=1}^{\ell} |g_k^i|}$  is controllable, it follows  
574 from result for the basic case that

$$\frac{1}{n} \sum_{k=1}^n e^{C_2 \sum_{i=1}^{\ell} |g_k^i|} \xrightarrow{a.s.} \mathbb{E}_{z \sim \mathcal{N}(0, \Sigma|g^1)} e^{C_2 \sum_{i=1}^{\ell} |z^i|}.$$

575 Since  $\sigma_n \xrightarrow{a.s.} \sigma$  and  $\alpha$  is continuous, it follows from Lemma A.1 that  $\alpha(\sigma_n) \xrightarrow{a.s.} \alpha(\sigma)$  and further

$$|B_n| \leq C_1 \left( \frac{1}{n} \sum_{k=1}^n e^{C_2 \sum_{i=1}^{\ell} |g_k^i|} \right) (\alpha(\sigma_n) - \alpha(\sigma)) \xrightarrow{a.s.} 0.$$

576  **$C_n$  converges to 0 almost surely**

577 Define function  $\hat{\Phi}(z^1, \dots, z^{\ell}) := \mathbb{E}_{z \sim \mathcal{N}(0,1)} \Phi(z^1, \dots, z^{\ell}, \sigma z)$ . Since  $\Phi$  is controllable,  $\hat{\Phi}$  is also a  
578 controllable function. Then it follows from the inductive hypothesis that

$$\begin{aligned}
\frac{1}{n} \sum_{k=1}^n \mathbb{E}_{z \sim \mathcal{N}(0, \sigma^2)} \Phi(g_k^1, \dots, g_k^{\ell}, z) &= \frac{1}{n} \sum_{k=1}^n \mathbb{E}_{z \sim \mathcal{N}(0,1)} \Phi(g_k^1, \dots, g_k^{\ell}, \sigma z) \\
&= \frac{1}{n} \sum_{k=1}^n \hat{\Phi}(g_k^1, \dots, g_k^{\ell}) \\
&\xrightarrow{a.s.} \mathbb{E} [\hat{\Phi}(z^1, \dots, z^{\ell})] \\
&= \mathbb{E} [\mathbb{E}_{z \sim \mathcal{N}(0,1)} \Phi(z^1, \dots, z^{\ell}, \sigma z)] \\
&= \mathbb{E} [\Phi(z^1, \dots, z^{\ell}, z^{\ell+1})]
\end{aligned}$$

579 Thus,  $C_n \xrightarrow{a.s.} 0$ .

#### 580 **B.4 Proof of Lemma B.1: general case for shared matrices**

581 Now in this section, we prove the desired result when the weight matrices are shared, *i.e.*,  $W^{\ell} = W$ .  
582 Assume the result holds for  $\ell$ , then we will show the desired result still holds for  $\ell + 1$ . Note that

$$g^{\ell+1} = Wh^{\ell}.$$

583 As  $W$  is used before, we have

$$g^i = Wh^{i-1}, \quad \forall i \in [\ell].$$

584 Then define

$$G := [g^1 \ g^2 \ \cdots \ g^\ell] \in \mathbb{R}^{n \times \ell}, \quad H := [h^0 \ h^1 \ \cdots \ h^{\ell-1}] \in \mathbb{R}^{n \times \ell}. \quad (30)$$

585 Then we have  $G = WH$ . Let  $\mathcal{B}$  be the  $\sigma$ -algebra spanned by all previous  $g^1, g^2, \dots, g^\ell$ . To obtain  
 586 the conditional distribution of  $g^{\ell+1}$  on  $\mathcal{B}$ , we first compute the conditional distribution of  $W$  on  $\mathcal{B}$ . It  
 587 follows from Lemma A.3 that

$$\begin{aligned} W|\mathcal{B} &= G (H^T H)^\dagger H^T + \tilde{W} \Pi_H^T \\ &\sim \mathcal{MN} (G (H^T H)^\dagger H^T, I_n, \Pi_H \Pi_H^T / n) \end{aligned}$$

588 where  $\Pi = I_n - HH^\dagger$  is the orthogonal projection onto  $\text{null}(H^T)$ , respectively. Therefore, we obtain

$$g^{\ell+1}|\mathcal{B} \sim \mathcal{N} \left( G (H^T H)^\dagger H^T h^\ell, \|\Pi^T h^\ell\|^2 / n I_n \right)$$

589 or equivalently

$$g_k^{\ell+1}|\mathcal{B} \stackrel{\text{independent}}{\sim} \mathcal{N} \left( G_k (H^T H)^\dagger H^T h^\ell, \|\Pi^T h^\ell\|^2 / n \right),$$

590 where  $G_k \in \mathbb{R}^{1 \times \ell}$  is the  $k$ -th row of  $G$ .

591 Since the activation function  $\phi$  is controllable by Lemma A.5, it follows from the inductive hypothesis  
 592 that

$$(h^i)^T (h^j) / n = \frac{1}{n} \sum_{k=1}^n \phi(g_k^i + g_k^1) \phi(g_k^j + g_k^1) \xrightarrow{a.s.} \mathbb{E} \phi(z^i + z^1) \phi(z^j + z^1) = \Sigma(z^{i+1}, z^{j+1}) \quad \forall i, j.$$

593 Then we have as  $n \rightarrow \infty$

$$\begin{aligned} H^T H / n &\xrightarrow{a.s.} \Sigma(Z^\ell, Z^\ell) \\ H^T h^\ell / n &\xrightarrow{a.s.} \Sigma(Z^\ell, z^{\ell+1}) \end{aligned}$$

594 where  $Z^\ell = [z^1 \ \cdots \ z^\ell]^T \in \mathbb{R}^{\ell \times 1}$ . Since (pseudo-)inverse is continuous function, we further obtain

$$v_n := (H^T H)^\dagger H^T h^\ell = (H^T H / n)^\dagger H^T h^\ell / n \xrightarrow{a.s.} \Sigma(Z^\ell, Z^\ell)^\dagger \Sigma(Z^\ell, z^{\ell+1}) := v. \quad (31)$$

595 By using the equality  $HH^\dagger = H(H^T H)^\dagger H^T$ , we have

$$\begin{aligned} \|\Pi^T h^\ell\|^2 / n &= \frac{1}{n} (h^\ell)^T (I_n - HH^\dagger) h^\ell \\ &= \frac{1}{n} (h^\ell)^T (I_n - HH^\dagger) h^\ell \\ &= \frac{1}{n} (h^\ell)^T h^\ell - ((h^\ell)^T H / n) (H^T H / n)^\dagger (H^T h^\ell / n) \\ &\xrightarrow{a.s.} \Sigma(z^{\ell+1}, z^{\ell+1}) - \Sigma(z^{\ell+1}, Z^\ell) \Sigma(Z^\ell, Z^\ell)^\dagger \Sigma(Z^\ell, z^{\ell+1}). \end{aligned}$$

596 By using triangular inequality, we have

$$\left| \frac{1}{n} \sum_{k=1}^n \Phi(g_k^1, \dots, g_k^\ell, g_k^{\ell+1}) - \mathbb{E} [\Phi(z^1, \dots, z^{\ell+1})] \right| \leq |A_n| + |B_n| + |C_n| + |D_n|,$$

597 where

$$A_n = \frac{1}{n} \sum_{k=1}^n \Phi(g_k^1, \dots, g_k^\ell, g_k^{\ell+1}) - \frac{1}{n} \sum_{k=1}^n \mathbb{E}_{z \sim \mathcal{N}(\mu_k, \sigma_n^2)} \Phi(g_k^1, \dots, g_k^\ell, z) \quad (32)$$

$$B_n = \frac{1}{n} \sum_{k=1}^n \mathbb{E}_{z \sim \mathcal{N}(\mu_k, \sigma_n^2)} \Phi(g_k^1, \dots, g_k^\ell, z) - \frac{1}{n} \sum_{k=1}^n \mathbb{E}_{z \sim \mathcal{N}(\mu_k, \sigma^2)} \Phi(g_k^1, \dots, g_k^\ell, z) \quad (33)$$

$$C_n = \frac{1}{n} \sum_{k=1}^n \mathbb{E}_{z \sim \mathcal{N}(\mu_k, \sigma^2)} \Phi(g_k^1, \dots, g_k^\ell, z) - \frac{1}{n} \sum_{k=1}^n \mathbb{E}_{z \sim \mathcal{N}(\mu_k, \sigma^2)} \Phi(g_k^1, \dots, g_k^\ell, z) \quad (34)$$

$$D_n = \frac{1}{n} \sum_{k=1}^n \mathbb{E}_{z \sim \mathcal{N}(\mu_k, \sigma^2)} \Phi(g_k^1, \dots, g_k^\ell, z) - \mathbb{E} [\Phi(z^1, \dots, z^{\ell+1})] \quad (35)$$

598 where

$$\mu_{k,n} = G_k^\ell (H^T H)^\dagger H^T h_\ell = G_k^\ell v_n, \quad (36)$$

$$\mu_k = G_k^\ell \Sigma(Z^\ell, Z^\ell)^\dagger \Sigma(Z^\ell, z^{\ell+1}) = G_k^\ell v, \quad (37)$$

$$\sigma_n^2 = \|\Pi^T h^\ell\|^2 \quad (38)$$

$$\sigma^2 = \Sigma(z^{\ell+1}, z^{\ell+1}) - \Sigma(z^{\ell+1}, Z^\ell) \Sigma(Z^\ell, Z^\ell)^\dagger \Sigma(Z^\ell, z^{\ell+1}). \quad (39)$$

#### 599 **B.4.1 $A_n$ converges to 0 almost surely**

600 Define random variables  $Z_k = \Phi(g_k^1, \dots, g_k^\ell, g_k^{\ell+1}) - \mathbb{E}_{z \sim \mathcal{N}(\mu_{k,n}, \sigma_n^2)} \Phi(g_k^1, \dots, g_k^\ell, z)$ . As  $X_k | \mathcal{B}$   
 601 are independent, we can easily show  $X_k$  are centered and uncorrelated. By using Jensen's inequality,  
 602  $Z_k^2 | \mathcal{B}$  can be upper bounded as follows

$$\mathbb{E}[Z_k^2 | \mathcal{B}] \leq 8 \mathbb{E}_{z \sim \mathcal{N}(\mu_{k,n}, \sigma_n^2)} |\Phi(g_k^1, \dots, g_k^\ell, z)|^2 \leq 8C_1 e^{2C_2 \sum_{i=1}^\ell |g_k^i|} e^{2C_2 |\mu_{k,n}|} e^{2C_2^2 \sigma_n^2} \quad (40)$$

603 As  $v_n \xrightarrow{a.s.} v$  by equation (31), we have  $\|v_n\| \leq 1 + \|v\|$ , eventually, almost surely. Thus, for large  
 604 enough  $n$ , we have

$$|\mu_{k,n}| = |G_k^\ell (H^T H)^\dagger (H^T h^\ell)| = \left| \sum_{i=1}^\ell v_{n,i} g_k^i \right| \leq (\|v\| + 1) \sum_{i=1}^\ell |g_k^i|, \quad (41)$$

605 where we also use the Cauchy-Schwartz inequality and square root inequality. It follows from  
 606 equation (40) that

$$\mathbb{E}[Z_k^2 | \mathcal{B}] \leq 8C_1 e^{(2C_2 + \|v\| + 1) \sum_{i=1}^\ell |g_k^i|} e^{2C_2^2 \sigma_n^2} = \hat{\Phi}(g_k^1, \dots, g_k^\ell) \cdot e^{2C_2^2 \sigma_n^2},$$

607 where  $\hat{\Phi}(x^1, \dots, x^\ell) := 8C_1 e^{(2C_2 + \|v\| + 1) \sum_{i=1}^\ell |x_i|}$  is clearly a controllable function. It follows from  
 608 inductive hypothesis and some basic properties of almost surely convergence in Lemma A.1 that

$$\frac{1}{n} \sum_{k=1}^n \mathbb{E}[Z_k^2 | \mathcal{B}] \leq \frac{1}{n} \sum_{k=1}^n \hat{\Phi}(g_k^1, \dots, g_k^\ell) \cdot e^{2C_2^2 \sigma_n^2} \xrightarrow{a.s.} \mathbb{E}[\hat{\Phi}(z^1, \dots, z^\ell)] \cdot e^{2C_2^2 \sigma^2}.$$

609 As RHS is a deterministic constant, we have  $\frac{1}{n} \sum_{k=1}^n \mathbb{E}[X_k^2 | \mathcal{B}] \in o(n^\rho)$  for all  $\rho > 0$ . Then by  
 610 using the same argument provided in Section B.3, we have  $A_n \xrightarrow{a.s.} 0$ .

#### 611 **$B_n$ converges to 0 almost surely**

612 **If  $\sigma > 0$**

613 In this subsection, we assume  $\sigma > 0$ . In addition, since  $\sigma_n \xrightarrow{a.s.} \sigma$ , we have  $\sigma_n \geq \sigma/2 > 0$  almost  
 614 surely for large enough  $n$ .

615 We can obtain the desired result  $B_n \xrightarrow{a.s.} 0$  by applying the same argument in Section B.3 to functions  
 616  $f_k$  and  $F_k$  redefined as follows

$$f_k(x) := \Phi(g_k^1, \dots, g_k^\ell, x), \quad F_k(\sigma) := \mathbb{E}_{z \sim \mathcal{N}(\mu_{k,n}, \sigma^2)} f_k(z).$$

617 By using Gaussian smoothing, for large enough  $n$ , we have

$$\begin{aligned}
|B_n| &\leq \frac{1}{n} \sum_{k=1}^n |F_k(\sigma_n) - F_k(\sigma)| \\
&\leq \frac{1}{n} \sum_{k=1}^n \int_{\sigma}^{\sigma_n} |F'_k(t)| dt, \quad \text{assume } \sigma \leq \sigma_n \\
&\leq \frac{1}{n} \sum_{k=1}^n \int_{\sigma}^{\sigma_n} t^{-1} \mathbb{E}_{z \sim \mathcal{N}(0,1)} |f_k(\mu_{k,n} + tz)(t^2 - 1)| dt, \quad (a) \\
&\leq \frac{1}{n} \sum_{k=1}^n \int_{\sigma}^{\sigma_n} t^{-1} \mathbb{E}_{z \sim \mathcal{N}(0,1)} C_1 e^{(C_2 + \|v\| + 1) \sum_{i=1}^{\ell} |g_k^i| + C_2 t|z| + t} dt, \quad (b) \\
&\leq \frac{1}{n} \sum_{k=1}^n \int_{\sigma}^{\sigma_n} t^{-1} C_1 e^{(C_2 + \|v\| + 1) \sum_{i=1}^{\ell} |g_k^i| + C_2 t^2/2 + t} dt, \quad (c) \\
&= C_1 \left( \frac{1}{n} \sum_{k=1}^n e^{(C_2 + \|v\| + 1) \sum_{i=1}^{\ell} |g_k^i|} \right) (\alpha(\sigma_n) - \alpha(\sigma)),
\end{aligned}$$

618 where (a) is by Lemma A.2, (b) is because  $f_k$  is controllable since  $\Phi$  is, (c) is by Lemma A.6 and  
619 equation (41), and  $\alpha(t)$  is the anti-derivative of the function  $\dot{\alpha}(t) = t^{-1} C_1 e^{C_2 t^2/2 + t}$ . Here,  $\dot{\alpha}(t)$  is  
620 continuous, so that  $\alpha(t)$  is well-defined and continuous. Since  $e^{C \sum_{i=1}^{\ell} |g_k^i|}$  is controllable for any  
621 constant  $C$ , it follows from the inductive hypothesis that

$$\frac{1}{n} \sum_{k=1}^n e^{(C_2 + \|v\| + 1) \sum_{i=1}^{\ell} |g_k^i|} \xrightarrow{a.s.} \mathbb{E} \left[ e^{(C_2 + \|v\| + 1) \sum_{i=1}^{\ell} |z_i|} \right] < \infty.$$

622 Since  $\sigma_n \xrightarrow{a.s.} \sigma$  and  $\alpha$  is continuous, it follows from Lemma A.1 that  $\alpha(\sigma_n) \xrightarrow{a.s.} \alpha(\sigma)$  and further

$$|B_n| \leq C_1 \left( \frac{1}{n} \sum_{k=1}^n e^{(C_2 + \|v\| + 1) \sum_{i=1}^{\ell} |g_k^i|} \right) (\alpha(\sigma_n) - \alpha(\sigma)) \xrightarrow{a.s.} 0.$$

623 **If  $\sigma = 0$**

624 In this subsection, we consider when  $\sigma = 0$ . Note that the argument in the case  $\sigma > 0$  also holds if  
625  $\sigma = 0$  and  $\sigma_n \neq 0$  (infinitely often), because the derivatives  $F'_k(t)$  are well-defined if either  $\sigma > 0$  or  
626  $\sigma_n > 0$ . Thus, we only need to analyze the case where  $\sigma = 0$  and  $\sigma_n = 0$  eventually.

627 For  $\sigma = 0$ , we have  $\Sigma(z^{\ell+1}, z^{\ell+1}) = \Sigma(z^{\ell+1}, Z^{\ell}) \Sigma(Z^{\ell}, Z^{\ell})^{\dagger} \Sigma(Z^{\ell}, z^{\ell+1})$ . By Lemma A.4, we  
628 have

$$z^{\ell+1} = \Sigma(z^{\ell+1}, Z^{\ell}) \Sigma(Z^{\ell}, Z^{\ell})^{\dagger} Z^{\ell} = v Z^{\ell}, \quad a.s.$$

629 For controllable  $\Phi$ , we can show the function  $\hat{\Phi} : (g_k^1, \dots, g_k^{\ell}) \mapsto \Phi(g_k^1, \dots, g_k^{\ell}, G_k^{\ell} v_n)$  is also  
630 controllable as follows

$$\begin{aligned}
|\hat{\Phi}(g_k^1, \dots, g_k^{\ell})| &= |\Phi(g_k^1, \dots, g_k^{\ell}, G_k^{\ell} v_n)| \\
&\leq C_1 e^{C_2 \sum_{i=1}^{\ell} |g_k^i| + C_2 |\sum_{i=1}^{\ell} v_{n,i} g_k^i|} \\
&\leq C_1 e^{(2C_2 + \|v\| + 1) \sum_{i=1}^{\ell} |g_k^i|},
\end{aligned}$$

631 where the second inequality follows from equation (31). By using the inductive hypothesis, we obtain

$$\begin{aligned}
\frac{1}{n} \sum_{k=1}^n \Phi(g_k^1, \dots, g_k^{\ell}, G_k^{\ell} v_n) &= \frac{1}{n} \sum_{k=1}^n \hat{\Phi}(g_k^1, \dots, g_k^{\ell}) \\
&\xrightarrow{a.s.} \mathbb{E} [\hat{\Phi}(z^1, \dots, z^{\ell})] \\
&= \mathbb{E} [\Phi(z^1, \dots, z^{\ell}, v Z^{\ell})] \\
&= \mathbb{E} [\Phi(z^1, \dots, z^{\ell+1})]. \tag{42}
\end{aligned}$$

Moreover, as we assume  $\sigma_n = 0$  for all large enough  $n$ , we obtain  $g_k^{\ell+1}|\mathcal{B} = G_k^\ell v_n$  almost surely. Then for large enough  $n$ , we obtain

$$\frac{1}{n} \sum_{k=1}^n \mathbb{E}_{z \sim \mathcal{N}(\mu_{k,n}, \sigma_n^2)} \Phi(G_k^\ell, z) = \frac{1}{n} \sum_{k=1}^n \Phi(g_k^1, \dots, g_k^\ell, \mu_{k,n}) = \frac{1}{n} \sum_{k=1}^n \Phi(g_k^1, \dots, g_k^\ell, G_k^\ell v_n) \quad (43)$$

Combining  $A_n \xrightarrow{a.s.} 0$  with equations (42) and (43) yields  $B_n \xrightarrow{a.s.} 0$ .

#### B.4.2 $C_n$ converges to 0 almost surely

As discussed in Section B.4.1, we can assume  $\sigma > 0$ . By using Gaussian smoothing again, we can easily show  $C_n \xrightarrow{a.s.} 0$  since  $\mu_{k,n} \xrightarrow{a.s.} \mu_k$ . Define functions

$$f_k(x) = \Phi(g_k^1, \dots, g_k^\ell, x), \quad F_k(\mu) = \mathbb{E}_{z \sim \mathcal{N}(\mu, \sigma^2)} f_k(z).$$

It follows from Lemma A.2 that

$$\begin{aligned} |C_n| &\leq \frac{1}{n} \sum_{k=1}^n |F_k(\mu_{k,n}) - F_k(\mu_k)| \\ &\leq \frac{1}{n} \sum_{k=1}^n \int_{\mu_k}^{\mu_{k,n}} |F_k'(t)| dt, \quad \text{assume } \mu_k \leq \mu_{k,n} \\ &\leq \frac{1}{n} \sum_{k=1}^n \int_{\mu_k}^{\mu_{k,n}} \frac{1}{\sigma} \mathbb{E}_{z \sim \mathcal{N}(0,1)} |f_k(t + \sigma z)| |z| dt \\ &\leq \frac{1}{n} \sum_{k=1}^n \int_{\mu_k}^{\mu_{k,n}} \frac{1}{\sigma} \mathbb{E}_{z \sim \mathcal{N}(0,1)} C_1 e^{C_2 \sum_{i=1}^\ell |g_k^i| + C_2 t + (C_2 \sigma + 1)|z|} dt \\ &\leq \frac{1}{\sigma} C_1 e^{(C_2 \sigma + 1)^2/2} \cdot \frac{1}{n} \sum_{k=1}^n e^{C_2 \sum_{i=1}^\ell |g_k^i|} \cdot [\beta(\mu_{k,n}) - \beta(\mu_k)], \end{aligned}$$

where  $\beta(\mu)$  is the anti-derivative of the function  $\dot{\beta}(t) = e^{C_2 t}$ . Here  $\beta$  is well-defined and continuous since  $\dot{\beta}$  is continuous. As  $\mu_{k,n} \xrightarrow{a.s.} \mu_k$ , it follows from inductive hypothesis and Lemma A.1 that  $C_n \xrightarrow{a.s.} 0$ .

#### $D_n$ converges to 0 almost surely

In this section, we can show  $D_n \xrightarrow{a.s.} 0$  straightforward from the induction. Define functions

$$\hat{\Phi}(z^1, \dots, z^\ell) := \mathbb{E}_{z \sim \mathcal{N}(0,1)} \left[ \Phi(z^1, \dots, z^\ell, \sum_{i=1}^\ell v_i z_i + \sigma z) \right].$$

Here  $\hat{\Phi}$  is controllable as  $\Phi$  is. By applying the inductive hypothesis on  $\hat{\Phi}$ , we obtain

$$\begin{aligned} D_n &= \left| \frac{1}{n} \sum_{k=1}^n \mathbb{E}_{z \sim \mathcal{N}(\mu_k, \sigma^2)} \Phi(g_k^1, \dots, g_k^\ell, z) - \mathbb{E} [\Phi(z^1, \dots, z^{\ell+1})] \right| \\ &= \left| \frac{1}{n} \sum_{k=1}^n \mathbb{E}_{z \sim \mathcal{N}(0,1)} \Phi(g_k^1, \dots, g_k^\ell, \mu_k + \sigma z) - \mathbb{E}_{z^1, \dots, z^\ell} \mathbb{E}_{z^{\ell+1} | z^1, \dots, z^\ell} \Phi(z^1, \dots, z^{\ell+1}) \right| \\ &= \left| \frac{1}{n} \sum_{k=1}^n \mathbb{E}_{z \sim \mathcal{N}(0,1)} \Phi(g_k^1, \dots, g_k^\ell, \mu_k + \sigma z) - \mathbb{E}_{z^1, \dots, z^\ell} \mathbb{E}_{z \sim \mathcal{N}(0,1)} \Phi(z^1, \dots, \sigma z) \right| \\ &= \left| \frac{1}{n} \sum_{k=1}^n \hat{\Phi}(g_k^1, \dots, g_k^\ell) - \mathbb{E}_{z^1, \dots, z^\ell} \hat{\Phi}(z^1, \dots, z^\ell) \right| \\ &\xrightarrow{a.s.} 0, \end{aligned}$$

where we use the fact  $\mu_k = G_k^\ell v = \sum_{i=1}^\ell v_i g_k^i$ .

646 **C Proof of Corollary 4.2**

647 Define Gaussian random variables  $u^\ell(x)$  that is encoded by input  $x$  as follows for all  $\ell = [2, L - 1]$

$$u^1(x) = z^1(x) \tag{44}$$

$$u^\ell(x) = z^\ell(x) + z^1(x). \tag{45}$$

648 Then we can easily compute the corresponding covariance as follows for  $\ell \geq 2$

$$\begin{aligned} \text{cov}(u^1(x), u^1(x')) &= \text{cov}(z^1(x), z^1(x')) \\ &= \Sigma^1(x, x') \\ \text{cov}(u^\ell(x), u^\ell(x')) &= \text{cov}(z^\ell(x) + z^1(x), z^\ell(x') + z^1(x')) \\ &= \text{cov}(z^\ell(x), z^\ell(x')) + \text{cov}(z^1(x), z^1(x')) \\ &= \Sigma^\ell(x, x') + \Sigma^1(x, x') \end{aligned}$$

## D Proof of Theorem 4.3

This section is deducted to prove the strict positive definiteness of  $\Sigma^L$ . We will prove it by using the notion of *dual activation* and *Hermitian expansion*.

Let  $x \sim \mathcal{N}(0, 1)$  and  $f : \mathbb{R} \rightarrow \mathbb{R}$ . Then we can define an inner product

$$\langle f, g \rangle := \mathbb{E}_{x \sim \mathcal{N}(0,1)} f(x)g(x).$$

Thus, we define a Hilbert space of functions  $\mathcal{H}$ , that is,  $f \in \mathcal{H}$  if and only if

$$\|f\|^2 = \mathbb{E}_{x \sim \mathcal{N}(0,1)} |f(x)|^2 < \infty.$$

Next, consider the function sequence  $1, x, x^2, \dots$ . Clearly, they are independent. Then apply Gram-Schmidt process to the function sequence w.r.t. the inner product we define before, and we obtain  $\{h_n\}$  the **(normalized) Hermite polynomial** that is an **orthonormal basis** to the Hilbert space  $\mathcal{H}$ .

Now, we are ready to introduce *dual activation*. The **dual activation**  $\hat{\phi} : [-1, 1] \rightarrow \mathbb{R}$  of an activation  $\phi : \mathbb{R} \rightarrow \mathbb{R}$  is defined by

$$\hat{\phi}(\rho) := \mathbb{E}_{(X,Y) \sim \mathcal{N}_\rho} \phi(X)\phi(Y). \quad (46)$$

where  $\mathcal{N}_\rho$  is multidimensional Gaussian distribution with mean 0 and covariance matrix  $\begin{bmatrix} 1 & \rho \\ \rho & 1 \end{bmatrix}$ .

Then the **dual kernel**  $k_\phi$  is given by

$$k_\phi(x, x') := \hat{\phi}(\langle x, x' \rangle).$$

If a function  $\phi \in \mathcal{H}$ , we not only can obtain an expansion by using the orthonormal basis of Hermitian polynomials but also an expansion to the dual activation  $\hat{\phi}$  by using the same Hermitian coefficients. As a consequence, the corresponding dual kernel  $k_\phi$  can be shown to be strict positive definite by using the Hermitian expansion.

**Lemma D.1.** [11, Lemma 12] If  $\phi \in \mathcal{H}$ , then

$$\phi(x) = \sum_{n=0}^{\infty} a_n h_n(x), \quad (47)$$

$$\hat{\phi}(\rho) = \sum_{n=0}^{\infty} a_n^2 \rho^n. \quad (48)$$

where  $a_n := \langle h_n, \phi \rangle$  is the **Hermite coefficients**, and the above is **Hermitian expansion**.

**Theorem D.1.** [21, Theorem 3][15, Theorem 1] For a function  $f : [-1, 1] \rightarrow \mathbb{R}$  with  $f = \sum_{n=0}^{\infty} b_n h_n$ , the kernel  $K_f : S^{n_0-1} \times S^{n_0-1} \rightarrow \mathbb{R}$  defined by

$$K_f(x, x') := f(x^T x')$$

is **strictly positive definite** for any  $n_0 \geq 1$  if and only if the coefficients  $b_n > 0$  for infinitely many even and odd integer  $n$ .

Now we are ready to prove the kernel or covariance function  $\Sigma^L$  is strict positive definite by using Gaussian measure techniques on the existence of positive definiteness.

**Lemma D.2.** Suppose  $\phi$  is non-polynomial Lipschitz continuous. If  $\Sigma^\ell$  is strictly positive, then  $\Sigma^{\ell+1}$  is also strictly positive definite.

*Proof.* Assume the contrary. Then there exists a finite distinct collection  $\{x_i\}_{i=1}^n$  and some constants  $\{c_i\}_{i=1}^n$  such that

$$0 = \sum_{i,j=1}^n c_i c_j \Sigma^{\ell+1}(x_i, x_j) = \mathbb{E} \left[ \sum_{i=1}^n c_i \phi(u_i) \right]^2.$$

677 This indicates  $\sum_{i=1}^n c_i \phi(u_i) = 0$  almost surely. Note that we have the random variables  $(u_i, u_j)$   
 678 follows Gaussian distribution given by

$$(u_i, u_j) \sim \mathcal{N}(0, A^\ell(x_i, x_j)).$$

679 WLOG, we can assume  $c_1 \neq 0$ . Then for some  $\phi(u_1) \neq 0$ , we choose  $u_1 = \dots = u_n = u_2$ . Then

$$c_1 \phi(u_1) + (c_2 + \dots + c_n) \phi(u_1) = 0,$$

680 indicates  $c_1 = -(c_2 + \dots + c_n)$ . Then for any  $u \neq u'$ , we have

$$c_1 \phi(u) + (-c_1) \phi(u') = 0$$

681 This implies  $\phi(u) = \phi(u')$ , but it contradicts  $\phi$  is non-constant.

682

□

683 **Lemma D.3.** Suppose  $\phi$  is non-polynomial Lipschitz continuous. Then  $\Sigma^2$  is strictly positive definite.

684 *Proof.* For  $\ell = 2$ , we have

$$\Sigma^2(x, x') = \sigma_2^2 \mathbb{E}_{(u,v) \sim \mathcal{N}(0, A^1(x, x'))} [\phi(u) \phi(v)],$$

685 where

$$A^1(x, x') = \begin{bmatrix} 1 & \langle x, x' \rangle \\ \langle x', x \rangle & 1 \end{bmatrix}.$$

686 Then we have

$$\Sigma^2(x, x') = \sigma_2^2 \hat{\mu}(x^T x')$$

687 where  $\mu(x) := \phi(x \sigma_u)$ .

688 Clearly,  $\mu$  is Lipschitz continuous since  $\phi$  is. Let the expansion of  $\mu$  in Hermite polynomials  $\{h_n\}_{n=0}^\infty$   
 689 to be given as  $\mu = \sum_{n=0}^\infty a_n h_n$ . Then we can write  $\hat{\mu}$  as  $\hat{\mu}(\rho) = \sum_{n=0}^\infty a_n^2 \rho^n$ . Then we have

$$\Sigma^2(x, x') = \sigma_w^2 \hat{\mu}(x^T x') = \sigma_w^2 \sum_{n=0}^\infty a_n^2 (x^T x')^n.$$

690 Since  $\phi$  is assumed non-polynomials,  $\mu$  is also non-polynomial, and so there are infinitely many  
 691 number of nonzero  $a_n$  in the expansion. Thus,  $b_n := a_n^2 > 0$  for infinitely many even and odd  
 692 numbers. Since  $\sigma_w^2 > 0$ , we have  $\Sigma^2$  is strictly positive definite. □

693 Then we obtain  $\Sigma^L$  is strict positive definite by combining Lemma D.2 and D.3



## E Proof of Lemma 4.1

This section we show the limiting covariance function  $\Sigma^*$  is well defined. As each  $\Sigma^L$  satisfies Cauchy-Schwartz inequality, it suffices to show  $\Sigma^*(x, x)$  is well defined, which is given in Lemma E.1.

**Lemma E.1.** Choose  $\sigma_w > 0$  small for which  $\beta := \frac{\sigma_w^2}{2} \mathbb{E}|z|^2|z^2 - 1| < 1$ , where  $z$  is standard Gaussian random variable. Then we have for every  $x \in \mathbb{S}^{n_{in}-1}$  and  $\ell \in [2, L]$

$$|\Sigma^{\ell+1}(x, x) - \Sigma^\ell(x, x)| \leq \beta |\Sigma^\ell(x, x) - \Sigma^{\ell-1}(x, x)|. \quad (49)$$

Therefore,  $\Sigma^*(x, x) := \lim_{\ell \rightarrow \infty} \Sigma^\ell(x, x)$  exists uniquely and

$$0 < \Sigma^*(x, x) \leq (1 + 1/\beta) \Sigma^2(x, x). \quad (50)$$

*Proof.* Fix  $x$  and we denote  $\sigma_\ell^2 := \Sigma^\ell(x, x)$  to simplify the notation. Define function  $\Phi(\sigma) :=$

$$\mathbb{E}_{u \sim \mathcal{N}(0, \sigma^2)} \phi(u)^2$$

$$\begin{aligned} \sigma_{\ell+1}^2 - \sigma_\ell^2 &= \sigma_w^2 \left( \mathbb{E}_{u^{\ell+1} \sim \mathcal{N}(0, \sigma_\ell^2 + \sigma_1^2)} \phi(u^{\ell+1})^2 - \mathbb{E}_{u^\ell \sim \mathcal{N}(0, \sigma_{\ell-1}^2 + \sigma_1^2)} \phi(u^\ell)^2 \right) \\ &= \sigma_w^2 \left( \Phi \left( \sqrt{\sigma_\ell^2 + \sigma_1^2} \right) - \Phi \left( \sqrt{\sigma_{\ell-1}^2 + \sigma_1^2} \right) \right) \\ &= \sigma_w^2 \int_{\sqrt{\sigma_{\ell-1}^2 + \sigma_1^2}}^{\sqrt{\sigma_\ell^2 + \sigma_1^2}} \Phi'(t) dt \\ &= \sigma_w^2 \int_{\sqrt{\sigma_{\ell-1}^2 + \sigma_1^2}}^{\sqrt{\sigma_\ell^2 + \sigma_1^2}} \frac{1}{t} \mathbb{E}_z \phi(tz)^2 (z^2 - 1) dt \\ &\leq \sigma_w^2 \int_{\sqrt{\sigma_{\ell-1}^2 + \sigma_1^2}}^{\sqrt{\sigma_\ell^2 + \sigma_1^2}} \frac{1}{t} \mathbb{E}_z |tz|^2 |z^2 - 1| dt \\ &= \sigma_w^2 \mathbb{E}_z |z|^2 |z^2 - 1| \int_{\sqrt{\sigma_{\ell-1}^2 + \sigma_1^2}}^{\sqrt{\sigma_\ell^2 + \sigma_1^2}} t dt \\ &= \frac{\sigma_w^2 \mathbb{E}_z |z|^2 |z^2 - 1|}{2} |\sigma_\ell^2 - \sigma_{\ell-1}^2| \\ &= \beta |\sigma_\ell^2 - \sigma_{\ell-1}^2|, \end{aligned}$$

where  $\beta := \frac{\sigma_w^2 \mathbb{E}_z |z|^2 |z^2 - 1|}{2}$ . As we choose  $\sigma_w$  small such that  $\beta < 1$ , then the mapping

$$\sigma_{\ell+1}^2 = \mathbb{E}_{u \sim \mathcal{N}(0, \sigma_\ell^2 + \sigma_1^2)} [\phi(u)^2]$$

is a contraction. Thus, it has unique fixed point  $\sigma_*$  such that

$$\sigma_*^2 = \mathbb{E}_{z \sim \mathcal{N}(0, \sigma_*^2 + \sigma_1^2)} \phi(u)^2. \quad (51)$$

In addition, let  $\tau_\ell^2 = \sigma_\ell^2 + \sigma_1^2$  and  $\tau_1^2 = \sigma_1^2$ , then we have

$$|\tau_{\ell+1}^2 - \tau_\ell^2| = |\sigma_{\ell+1}^2 - \sigma_\ell^2| \leq \beta |\sigma_\ell^2 - \sigma_{\ell-1}^2| = \beta |\tau_\ell^2 - \tau_{\ell-1}^2|.$$

Then we repeat this inequality for  $\ell$  times and obtain

$$|\tau_{\ell+1}^2 - \tau_\ell^2| \leq \beta^{\ell-1} |\tau_2^2 - \tau_1^2|.$$

As LHS is  $|\sigma_{\ell+1}^2 - \sigma_\ell^2|$  and RHS is  $\sigma_2^2$ , we obtain

$$|\sigma_{\ell+1}^2 - \sigma_\ell^2| \leq \beta^{\ell-1} \sigma_2^2.$$

Thus, we have

$$|\sigma_{\ell+1}^2 - \sigma_2^2| \leq \sum_{s=2}^{\ell} |\sigma_{s+1}^2 - \sigma_s^2| \leq \sum_{s=2}^{\ell} \beta^{s-1} \sigma_2^2 \leq \frac{1}{\beta} \sigma_2^2.$$

708 Therefore, we obtain

$$\sigma_\ell^2 \leq \left(1 + \frac{1}{\beta}\right) \sigma_2^2 < \infty, \quad \forall \ell \geq 2.$$

709 Now, suppose  $\sigma_* = 0$ , then we have equation

$$\begin{aligned} 0 &= \sigma_*^2 \\ &= \mathbb{E}_{u \sim \mathcal{N}(0, \sigma_*^2 + \sigma_1^2)} \phi(u)^2 \\ &= \mathbb{E}_{u \sim \mathcal{N}(0, \sigma_1^2)} \phi(u)^2 \\ &= \mathbb{E}_{u \sim \mathcal{N}(0, 1)} \phi(u)^2 \end{aligned}$$

710 where we use the fact  $\sigma_1^2 = 1$ . The equation above implies  $\phi(u) = 0$  almost surely, which is  
711 impossible since  $u$  follows standard Gaussian and  $\phi$  is nonconstant.  $\square$

712 **E.1**  $\Sigma^*(x, x) = \Sigma^*(x', x')$

713 In this subsection, we will first show  $\Sigma^\ell(x, x) = \Sigma^\ell(x', x')$  for all  $x, x'$ . The desired result is obtained  
714 by letting  $\ell \rightarrow \infty$ .

715 Given  $x_i$  and  $x_j$ , let  $A_{ij}^\ell := \Sigma^\ell(x_i, x_j)$ . We prove by induction. For the basic case, we have

$$A_{ii}^1 = \mathbb{E} |\sigma(x_i^T z)|^2 = \mathbb{E} |\sigma(u_j^1)|^2 = \mathbb{E} |\sigma(u_j^1)|^2 = A_{jj}^1,$$

716 where we use the fact  $u_i \stackrel{i.i.d.}{\sim} \mathcal{N}(0, 1)$  due to  $\|x_i\|^2 = 1$ .

717 Assume the result holds for  $\ell - 1$ . Then we will show the result for  $\ell$ . Note that

$$\text{Var}(u_i^{\ell-1}) = A_{ii}^{\ell-1} + A_{ii}^1 = A_{jj}^{\ell-1} + A_{jj}^1 = \text{Var}(u_j^{\ell-1}),$$

718 where the last equality holds follow from the inductive hypothesis. As each  $u_i^{\ell-1}$  is a centered  
719 Gaussian random variable, equal variance implies equal distribution. Then we obtain

$$A_{ii}^\ell = \mathbb{E}_{u_i^{\ell-1} \sim \mathcal{N}(0, A_{ii}^{\ell-1} + A_{ii}^1)} |\sigma(u_i^{\ell-1})|^2 = \mathbb{E}_{u_j^{\ell-1} \sim \mathcal{N}(0, A_{jj}^{\ell-1} + A_{jj}^1)} |\sigma(u_j^{\ell-1})|^2 = A_{jj}^\ell.$$

720 Then let  $\ell \rightarrow \infty$  and we obtain the desired result.

## F Proof of Lemma 4.2

In Theorem 4.1 and Appendix B, we have shown that for any controllable function  $\Phi$ ,  $\frac{1}{n}\Phi(g_k^1, \dots, g_k^\ell)$  converges almost surely. Here we conduct a stronger result by providing the convergence rates.

**Lemma F.1.** *Let  $\Phi$  be a controllable function. Then for any  $\ell \geq 1$ , quantities  $\frac{1}{n} \sum_{k=1}^n \Phi(g_k^1(x), g_k^1(x'), g_k^\ell(x), g_k^\ell(x'))$  converges to  $\mathbb{E} [\Phi(z^1(x), z^1(x'), z^\ell(x), z^\ell(x'))]$  a.s. with a rate at least  $n^{-1/4}$ , i.e.,*

$$\left| \frac{1}{n} \sum_{k=1}^n \Phi(g_k^1(x), g_k^1(x'), g_k^\ell(x), g_k^\ell(x')) - \mathbb{E} [\Phi(z^1(x), z^1(x'), z^\ell(x), z^\ell(x'))] \right| \leq n^{-1/4}, \quad \text{a.s.} \quad (52)$$

Intuitively, Lemma F.1 provides a convergence rate of width. The following Lemma provides a convergence rate for depth.

**Lemma F.2.** *Choose  $\sigma_w > 0$  small for which  $\gamma := 2\sqrt{2}\sigma_w < 1$ . Then for every  $x \in \mathbb{S}^{n_{in}-1}$  and for any  $k$  and  $\ell$ , we have  $\|h^\ell(x) - h^k(x)\| \leq \frac{\gamma^\ell}{1-\gamma} \|h^1\|$  a.s. Consequently, the equilibrium point  $h^*(x)$  is uniquely determined a.s. Additionally, we have  $\|h^\ell(x)\| \leq \frac{1-\gamma^\ell}{1-\gamma} \|h^1\|$  a.s.*

Now, combines these two convergence rates, we can show the two limits can be switched. As a result, the DEQ  $f_\theta$  defined in (1) tends to a Gaussian Process.

### F.1 Proof of Lemma 4.2

Let  $h_n^\ell(x)$  to denote the post-activation at the  $\ell$ -th layer with width  $m$  and input  $x$  encoded. Let  $x$  and  $x'$  in  $\mathbb{S}^{d-1}$ . Then for any  $n \leq m$  and  $\ell \leq k$ , we have that

$$\begin{aligned} & \left| \frac{1}{n} \langle h_n^\ell(x), h_n^\ell(x') \rangle - \frac{1}{m} \langle h_m^k(x), h_m^k(x') \rangle \right| \\ & \leq \left| \frac{1}{n} \langle h_n^\ell(x), h_n^\ell(x') \rangle - \frac{1}{n} \langle h_n^k(x), h_n^k(x') \rangle \right| + \left| \frac{1}{n} \langle h_n^k(x), h_n^k(x') \rangle - \frac{1}{m} \langle h_m^k(x), h_m^k(x') \rangle \right|. \end{aligned}$$

In the following, we will bound each term. For the first term, by using Lemma F.2, we have

$$\begin{aligned} & \left| \frac{1}{n} \langle h_n^\ell(x), h_n^\ell(x') \rangle - \frac{1}{n} \langle h_n^k(x), h_n^k(x') \rangle \right| \\ & \leq \frac{1}{n} \|h_n^\ell(x)\| \cdot \|h_n^\ell(x') - h_n^k(x')\| + \frac{1}{n} \|h_n^\ell(x) - h_n^k(x)\| \cdot \|h_n^k(x')\| \\ & \leq \frac{1}{n} \cdot \frac{1}{1-\gamma} \|h_n^1(x)\| \cdot \frac{\gamma^\ell}{1-\gamma} \|h^1(x')\| + \frac{1}{n} \cdot \frac{1}{1-\gamma} \|h_n^1(x)\| \cdot \frac{\gamma^k}{1-\gamma} \|h_n^1(x')\| \end{aligned}$$

Combining Theorem A.2 with assumption  $\|x\| = 1$ , we have  $\|Ux\| \leq 2\sigma_u\sqrt{n}/\sqrt{n_{in}}$  a.s. WLOG, we assume  $\sigma_u = \sqrt{n_{in}}$ , then we have  $\|h_n^1(x)\| \leq 2\sqrt{n}$  and so

$$\left| \frac{1}{n} \langle h_n^\ell(x), h_n^\ell(x') \rangle - \frac{1}{n} \langle h_n^k(x), h_n^k(x') \rangle \right| \leq \frac{4}{(1-\gamma)^2} \gamma^\ell. \quad (53)$$

For the second term, we have

$$\left| \frac{1}{n} \langle h_n^k(x), h_n^k(x') \rangle - \frac{1}{m} \langle h_m^k(x), h_m^k(x') \rangle \right| \leq I_n + I_m, \quad (54)$$

where

$$I_n = \left| \frac{1}{n} \langle h_n^k(x), h_n^k(x') \rangle - \Sigma^k(x, x') \right| \quad (55)$$

By using Lemma F.1, we have

$$I_n \leq n^{-1/4} \quad (56)$$

743 Similarly,  $I_m \leq m^{-1/4}$ . Then we can combine these and get

$$\left| \frac{1}{n} \langle h_n^\ell(x), h_n^\ell(x') \rangle - \frac{1}{m} \langle h_m^k(x), h_m^k(x') \rangle \right| \leq A\gamma^\ell + Bn^{-1/4}, \quad (57)$$

744 where  $A = 4(1 - \gamma)^2$  and  $B = 2$ . Then letting  $m, \ell \rightarrow \infty$  sequentially yields

$$\left| \frac{1}{n} \langle h_n^\ell(x), h_n^\ell(x') \rangle - \Sigma^*(x, x') \right| \leq A\gamma^\ell + Bn^{-1/4},$$

## 745 **F.2 Proof of Lemma F.1**

746 As we discussed before, Lemma B.1 can be easily extended to Lemma B.2 by using same argument  
747 on different inputs  $x$  and  $x'$ . Similarly, here it suffices to show the desired result for single input  $x$ ,  
748 *i.e.*,

$$\left| \frac{1}{n} \sum_{k=1}^n \Phi(g_k^1(x), g_k^\ell(x)) - \mathbb{E} [\Phi(z^1(x), z^\ell(x))] \right| \leq n^{-1/4}, \quad a.s. \quad (58)$$

### 749 **F.2.1 Consider the basic case $\ell = 1$**

750 For  $\ell = 1$ , we have  $g^1 = Ux$  and so

$$g_k^1 \stackrel{i.i.d.}{\sim} \mathcal{N}(0, \|x\|^2/n_{in}).$$

751 Let  $X_k := \Phi(g_k^1) - \mathbb{E}\Phi(g_k^1)$ . Then  $\mathbb{E}X_k = 0$  and

$$\mathbb{E}|X_k|^2 = \mathbb{E}|\Phi(g_k^1) - \mathbb{E}\Phi(g_k^1)|^2 \leq 8\mathbb{E}|\Phi(z^1)|^2 \leq 8C\mathbb{E}e^{c|z_1|} < \infty,$$

752 where we use the fact  $z^1$  and  $g_k^1$  are identically distributed.

753 It follows from Markov's inequality, we have for any  $t > 0$

$$\mathbb{P} \left[ \left| \frac{1}{n} \sum_{k=1}^n \Phi(g_k^1) - \mathbb{E}\Phi(z^1) \right| > t \right] = \mathbb{P} \left[ \left| \frac{1}{n} \sum_{k=1}^n X_k \right| > t \right] \leq t^{-2} \mathbb{E} \left| \frac{1}{n} \sum_{k=1}^n X_k \right|^2 = t^{-2} n^{-1} \mathbb{E}|X_k|^2.$$

754 Therefore, we have  $\left| \frac{1}{n} \sum_{k=1}^n \Phi(g_k^1) - \mathbb{E}\Phi(z^1) \right| \rightarrow 0$  in probability as  $n \rightarrow \infty$ . It follows from  
755 Levy's Theorem that this convergence is almost surely because  $X_k$  are independent. Additionally, for  
756 any  $\varepsilon, \delta > 0$ , let  $t = R(n)\varepsilon$  and let RHS be less than  $\delta$ . Then we obtain

$$R(n) \geq \delta^{-1/2} \varepsilon^{-1} \mathbb{E}|X_k|^2 n^{-1/2},$$

757 which indicates the convergence rate is at least  $n^{-1/2}$ .

### 758 **F.2.2 The general case $\ell$**

759 We can use similar argument from Appendix C to obtain the desired result. Lemma B.2 or Lemma B.1  
760 has been shown weight-tied and weight-untied converges to the same Gaussian process. WLOG, we  
761 can just focus on the weight-untied case. Let  $\mathcal{B}$  be the  $\sigma$ -algebra spanned by  $g^1$  and  $g^\ell$ , then we have

$$g_k^{\ell+1} | \mathcal{B} \stackrel{i.i.d.}{\sim} \mathcal{N}(0, \|h^\ell\|^2/n).$$

762 By using the inductive hypothesis, we have

$$\sigma_{\ell,n}^2 := \|h^\ell\|^2/n \xrightarrow{a.s.} \mathbb{E}[\phi(z^\ell + z^1)] := \sigma_\ell^2 \quad (59)$$

763 with convergence rate  $n^{-1/4}$ , *i.e.*,

$$|\sigma_{\ell,n}^2 - \sigma_\ell^2| \leq n^{-1/4}, \quad a.s. \quad (60)$$

764 By using triangle inequality, we have

$$\left| \frac{1}{n} \sum_{k=1}^n \Phi(g_k^1, g_k^{\ell+1}) - \mathbb{E}\Phi(z^1, z^{\ell+1}) \right| \leq |A_n| + |B_n| + |C_n|,$$

765 where

$$\begin{aligned} A_n &= \frac{1}{n} \sum_{k=1}^n \Phi(g_k^1, g_k^{\ell+1}) - \frac{1}{n} \sum_{k=1}^n \mathbb{E} \Phi(g_k^1, \sigma_{\ell,n} z) \\ B_n &= \frac{1}{n} \sum_{k=1}^n \mathbb{E} \Phi(g_k^1, \sigma_{\ell,n} z) - \frac{1}{n} \sum_{k=1}^n \mathbb{E} \Phi(g_k^1, \sigma_{\ell} z) \\ C_n &= \frac{1}{n} \sum_{k=1}^n \mathbb{E} \Phi(g_k^1, \sigma_{\ell} z) - \mathbb{E} \Phi(z^1, z^{\ell+1}) \end{aligned}$$

766 **Convergence of  $A_n$**

767 Let  $Z_k := \Phi(g_k^1, g_k^{\ell+1}) - \mathbb{E} \Phi(g_k^1, \sigma_{\ell,n} z)$ . With the same argument in Appendix B, we have  $\mathbb{E}[Z_k | \mathcal{B}] =$   
 768 0 and  $\mathbb{E}[Z_k | \mathcal{B}]^2 \leq 8C_1 e^{2C_2 |g_k^1|} e^{2C_2^2 \sigma_{\ell,n}^2}$ . As  $\sigma_{\ell,n} \rightarrow \sigma_{\ell}$ , we have

$$\frac{1}{n} \sum_{k=1}^n \mathbb{E}[Z_k | \mathcal{B}]^2 \leq 8C_1 \left[ \frac{1}{n} \sum_{k=1}^n e^{2C_2 |g_k^1|} \right] e^{2C_2^2 \sigma_{\ell,n}^2} \xrightarrow{a.s.} 8C_1 \left[ \mathbb{E} e^{2C_2 |z^1|} \right] e^{2C_2^2 \sigma_{\ell}^2}.$$

769 Additionally, it follows from Theorem 4.4 that  $\sigma_{\ell} \rightarrow \sigma_*$  as  $\ell \rightarrow \infty$ , we obtain  $\sigma_{\ell} \leq C_3 \sigma_*$  for some  
 770 absolute constant  $C_3$ . Then for large enough  $n$ , we have

$$\frac{1}{n} \sum_{k=1}^n \mathbb{E}[Z_k | \mathcal{B}]^2 \leq 16C_1 \left[ \mathbb{E} e^{2C_2 |z^1|} \right] e^{4C_2^2 C_3^2 \sigma_*^2}. \quad (61)$$

771 As RHS is a deterministic constant, we obtain for large enough  $n$

$$\frac{1}{n} \sum_{k=1}^n \mathbb{E}[Z_k | \mathcal{B}]^2 \leq n^{\rho}, \quad \forall \rho > 0.$$

772 It is worth to note that we obtain the same result in Appendix B. However, RHS of (61) is independent  
 773 of  $\ell$ . As a consequence, the inequality (61) holds uniformly over all  $\ell$ . This potentially indicates the  
 774 limits of depth and width commutes. From here, with almost identical argument in Appendix B, we  
 775 obtain  $A_n \xrightarrow{a.s.} 0$  at rate  $n^{-1/4}$  by choosing  $\rho = 1/2$ .

776 **Convergence of  $B_n$**

777 Similarly, we can use the same argument in Appendix B to get

$$|B_n| \leq C_1 \left[ \frac{1}{n} \sum_{k=1}^n e^{C_2 |g_k^1|} \right] (\alpha(\sigma_{\ell,n}) - \alpha(\sigma_{\ell})).$$

778 As  $\frac{1}{n} \sum_{k=1}^n e^{C_2 |g_k^1|}$  is a controllable function of  $g_k^1$  and  $\sigma_{\ell,n} \xrightarrow{a.s.} \sigma_{\ell}$ , the inductive hypothesis implies  
 779  $B_n \xrightarrow{a.s.} 0$  at a rate  $n^{-1/4}$ .

780 **Convergence of  $C_n$**

781 Define function  $\hat{\Phi}(x) = \mathbb{E}_{z \sim \mathcal{N}(0,1)} \Phi(x, \sigma_{\ell} z)$ . Then  $C_n$  becomes

$$C_n = \frac{1}{n} \sum_{k=1}^n \hat{\Phi}(g_k^1) - \mathbb{E} \hat{\Phi}(z^1).$$

782 As  $\hat{\Phi}$  is controllable since  $\Phi$  is, the inductive hypothesis implies directly  $C_n \xrightarrow{a.s.} 0$  at a rate of  $n^{-1/4}$ .

783 **F.3 Proof of Lemma F.2**

784 It follows from Theorem A.2 that  $\frac{1}{\sqrt{n}}\|W\| \leq 2\sqrt{2}\sigma_w$  a.s. Then we can choose a small  $\sigma_w$  for which  
 785  $\gamma := 2\sqrt{2}\sigma_w < 1$ . Then for any  $\ell \geq 0$ , the Lipschitz continuity of  $\phi$  implies

$$\begin{aligned}\|h^{\ell+1} - h^\ell\| &= \frac{1}{\sqrt{n}}\|\phi(W h^\ell + g^1) - \phi(W h^{\ell-1} + g^1)\| \\ &\leq \frac{1}{\sqrt{n}}\|W h^\ell - W h^{\ell-1}\| \\ &\leq \frac{1}{\sqrt{n}}\|W\|\|h^\ell - h^{\ell-1}\| \\ &\leq \gamma\|h^\ell - h^{\ell-1}\|.\end{aligned}$$

786 Thus, we repeat this argument  $\ell$  times and obtain

$$\|h^{\ell+1} - h^\ell\| \leq \gamma^\ell\|h^1 - h^0\| = \gamma^\ell\|h^1\|$$

787 From here, for any  $k \geq \ell \geq 0$ , we have

$$\|h^\ell - h^k\| \leq \sum_{s=\ell}^{k-1} \|h^s - h^{s+1}\| \leq \sum_{s=\ell}^{k-1} \gamma^s \|h^1\| \leq \frac{\gamma^\ell(1 - \gamma^{k-\ell})}{1 - \gamma} \|h^1\|. \quad (62)$$

788 Thus, it follows from the completeness of  $\mathbb{R}^m$  that the unique  $h^*(x)$  exists. Additionally, let  $k \rightarrow \infty$ ,  
 789 then we have

$$\|h^\ell - h^*\| \leq \frac{\gamma^\ell}{1 - \gamma} \|h^1\|.$$

790 Let  $\ell = 0$ , then we obtain

$$\|h^k\| \leq \frac{1 - \gamma^k}{1 - \gamma} \|h^1\|.$$

791 **G Proof of Theorem 4.4**

792 By condition on the values of  $h^*$ , the outputs

$$f_{\theta,k}(x) = \langle v_k, h^* \rangle$$

793 are *i.i.d.* centered Gaussian random variables with covariance

$$\hat{\Sigma}(x, x') = \langle h^*(x), h^*(x') \rangle / n.$$

794 It follows from Lemma 4.2 that

$$\hat{\Sigma}(x, x') \xrightarrow{a.s.} \Sigma^*(x, x').$$

795 Specifically, the covariance  $\Sigma^*$  is deterministic and hence independent to  $h^*$ . Consequently, the  
 796 conditioned and unconditioned distributions of  $f_{\theta,k}$  are equal in the limit of  $n \rightarrow \infty$ : they are  
 797 *i.i.d.* centered Gaussian random variables with covariance  $\Sigma^*$ .

798 **H Proof of Theorem 4.5**

799 Equipped with the notion of dual activation and Theorem D.1, we are ready to prove Theorem 4.5,  
800 *i.e.*,  $\Sigma^*$  is strict positive definite.

801 By Lemma E.1, we have  $\Sigma^*(x, x) = \Sigma^*(x', x') := c$  and  $0 < c < \infty$  for all  $x, x'$ . Then we have

$$\Sigma^*(x, x') = \mathbb{E}_{u(x), u(x') \sim \mathcal{N}(0, A^*)} [\phi(u(x))\phi(u(x'))]$$

802 where

$$A^* = \begin{bmatrix} \Sigma^*(x, x) + \Sigma^1(x, x) & \Sigma^*(x, x') + \Sigma^1(x, x') \\ \Sigma^*(x', x) + \Sigma^1(x', x) & \Sigma^*(x, x) + \Sigma^1(x', x') \end{bmatrix} = \begin{bmatrix} c+1 & \Sigma^*(x, x') + \langle x, x' \rangle \\ \Sigma^*(x, x') + \langle x, x' \rangle & c+1 \end{bmatrix}.$$

803 By changing variable with  $u(x) = \sqrt{c+1}z(x)$ , we obtain

$$\Sigma^*(x, x') = \mathbb{E} [\mu(z(x))\mu(z(x'))] = \hat{\mu} \left( \frac{\Sigma^*(x, x') + \langle x, x' \rangle}{c+1} \right),$$

804 where  $\hat{\mu} : [-1, 1] \rightarrow \mathbb{R}$  is dual activation of activation function  $\mu(z) := \phi(\sqrt{c+1}z)$ .

805 Let  $\mu = \sum_{n=0}^{\infty} a_n h_n$  be the Hermite expansion, then we obtain  $\hat{\mu}$  as

$$\hat{\mu}(\rho) = \sum_{n=0}^{\infty} a_n^2 \rho^n.$$

806 Therefore,  $\Sigma^*$  has the expression

$$\Sigma^*(x, x') = \sum_{n=0}^{\infty} a_n^2 \left( \frac{\Sigma^*(x, x') + \langle x, x' \rangle}{c+1} \right)^n.$$

807 Since  $\phi$  is non-polynomial, so is  $\mu$ , and hence, there is an infinite number of nonzero  $a_n$ 's. By  
808 Theorem 2, we can conclude that  $\Sigma^*$  is strictly positive definite and complete the proof.

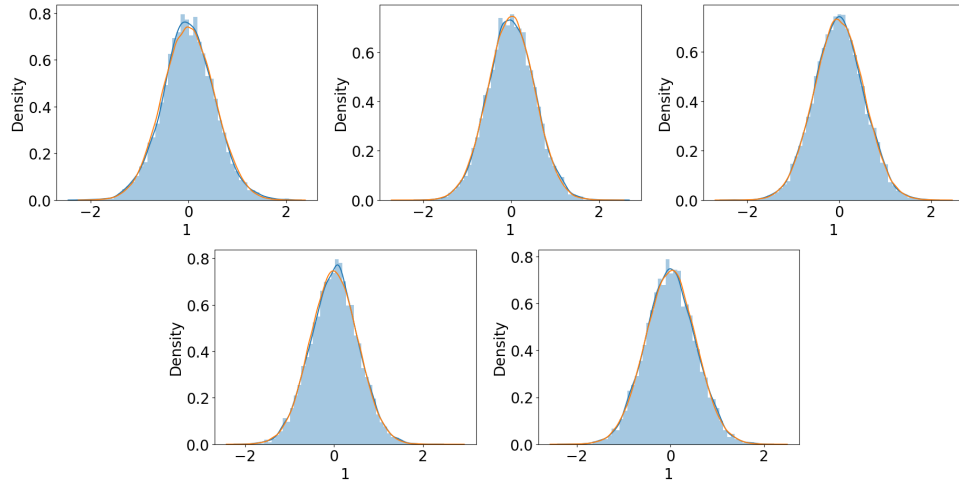

Figure 5: Histplot of the output distributions for five neural networks with widths 10, 50, 100, 200, 1000 (left to right); KS statistics: 0.02641, 0.00677, 0.00550, 0.00321, 0.00302, pvalue:  $9.74 \times 10^{-31}$ , 0.0202, 0.0969, 0.6808, 0.7498.
